# Supplementary material for: Development and validation of a risk prediction model for hypoproteinemia after adult cardiac valve surgery: implications for clinical care
Source: PeerJ. 2025 Jul 16;13:e19676. doi: 10.7717/peerj.19676 (PMC12275900; doi:10.7717/peerj.19676)
Supplement: Supplemental Information 1 [file peerj-13-19676-s001.xlsx]

## Sheet: Sheet1
Gender	Age	Education level	Retirement	Hypertension	Coronary heart disease	Diabetes	Cerebral infarction	2002 NRS nutritional score at admission	Body mass index	Hemoglobin on admission	White blood cell count	Red blood cell count	Platelet count	Serum potassium	Serum sodium	Serum calcium	Serum creatinine	Blood uric acid	Serum albumin on admission	Left ventricular ejection fraction	Left atrial anteroposterior diameter	Left ventricular end-systolic diameter	Chest infection	Frailty	Pre-operative heart failure	Heamodilution on CPB	Hypoproteinemia
Male	58	Junior high school and below	No	No	No	No	No	0	23.8	139	4.37	4.51	154	4.69	140	2.19	86	372.4	39.8	70	71	30	No	Yes	Yes	Yes	Yes
Female	71	Junior high school and below	No	No	No	No	No	1	22.1	109	3.66	3.87	239	3.33	141	2.17	67	320.8	35.7	68	34	33	No	No	No	No	No
Male	63	Junior high school and below	No	Yes	No	No	No	0	22.7	143	5.96	4.39	158	4.29	138	2.2	119	722.7	37.2	55	37	33	Yes	Yes	Yes	Yes	Yes
Male	33	College or above	No	No	No	No	No	0	29.8	166	4.67	6.25	222	3.91	141	2.34	75	435	44.7	68	38	36	No	Yes	No	No	No
Female	52	Junior high school and below	No	Yes	No	No	No	1	23.9	72	4.09	2.21	161	4.51	138	1.86	588	331.5	32.5	59	45	41	No	No	No	No	Yes
Female	59	Junior high school and below	No	No	No	No	No	0	28.2	135	5.84	4.65	219	3.09	143	2.26	47	186.1	39.8	63	48	37	No	No	Yes	No	No
Female	53	Junior high school and below	No	No	No	No	No	0	27.7	115	6.57	4.16	201	3.69	142	2.12	64	297.2	36.2	60	51	44	Yes	Yes	Yes	Yes	Yes
Male	57	Junior high school and below	No	Yes	No	No	No	0	25.4	124	5.95	4.24	189	3.67	139	2.19	86	356	33.9	59	38	39	No	No	No	No	Yes
Male	59	Junior high school and below	No	Yes	No	No	No	0	19.8	119	6.66	4.05	210	4.34	137	2.23	59	304	35.7	63	56	44	Yes	No	No	Yes	No
Female	63	Junior high school and below	No	No	No	Yes	Yes	2	26.4	131	4.82	4.25	172	3.27	141	2.2	54	352.7	36.1	59	44	32	Yes	Yes	Yes	No	Yes
Female	73	Junior high school and below	No	No	No	No	No	1	23.5	125	5.99	4.13	172	3.5	142.5	2.23	67	260	40	59	54	35	No	Yes	Yes	No	No
Male	73	Junior high school and below	No	Yes	No	No	No	2	21.5	120	6.5	3.95	176	4.02	140	2.27	59	289.3	31.1	75	42	25	No	Yes	Yes	Yes	Yes
Female	42	Junior high school and below	No	No	No	No	No	0	26.4	129	4.55	4.37	218	3.64	138	2.29	65	361.3	39.1	65	54	35	No	No	Yes	No	Yes
Male	55	Junior high school and below	No	No	No	No	No	2	20.4	140	6.72	4.82	188	3.87	141	2.23	74	317.4	39	71	29	30	No	Yes	No	Yes	No
Male	70	Junior high school and below	No	Yes	No	No	No	1	20.2	133	5.09	4.53	206	3.41	143	2.28	78	405.4	33.9	67	48	32	Yes	No	Yes	Yes	Yes
Female	69	Junior high school and below	No	Yes	No	No	No	0	19.24	133	4.53	4.38	147	4.88	145	2.33	64	291	33.7	61	42	33	No	No	Yes	No	Yes
Female	42	Junior high school and below	No	No	No	No	No	0	23.9	83	3.7	3.56	226	4.02	141	2.22	56	255	40	74	38	25	Yes	No	No	No	No
Male	51	Junior high school and below	No	No	No	No	No	0	25.1	176	6.21	5.51	184	3.64	141	2.45	64	415.6	43.9	39	57	53	No	No	Yes	No	No
Female	44	Junior high school and below	No	No	No	No	No	0	22.6	120	3.17	3.88	243	3.73	140	2.24	68	326.1	39.2	65	40	27	Yes	Yes	No	No	Yes
Female	58	Junior high school and below	No	Yes	No	No	No	0	26.3	108	3.86	3.8	163	3.58	141	2.3	53	399.4	34.6	74	47	29	Yes	Yes	No	No	Yes
Male	67	Junior high school and below	No	Yes	No	No	No	0	21.5	114	4.13	3.74	139	3.74	139	2.04	120	394	33.3	69	64	36	No	Yes	No	No	Yes
Female	50	Junior high school and below	No	No	No	No	No	0	32.6	136	7.25	4.81	198	4.03	138	2.28	41	297.4	37.3	72	40	31	No	No	No	No	No
Male	67	Junior high school and below	No	No	No	No	No	0	23	136	5	4.26	149	3.9	143	2.16	87	376.1	34.5	53	54	58	No	No	Yes	No	No
Male	50	Junior high school and below	No	No	No	No	No	0	20.9	130	4.78	4.47	185	3.79	142	2.26	68	344.2	38.5	76	32	35	No	No	No	Yes	No
Female	66	Junior high school and below	No	No	No	No	No	0	21.2	125	6.54	3.84	285	3.75	144	2.39	70	339	39.6	61	34	38	No	No	Yes	No	Yes
Male	52	Junior high school and below	No	Yes	No	No	No	0	22.9	151	5.62	5.02	180	4.3	140	2.32	77	447.6	40.3	56	44	45	No	No	Yes	Yes	Yes
Male	64	Junior high school and below	No	Yes	No	No	No	0	20.5	133	5.52	4.54	149	4.29	143	2.22	79	365	38	47	46	47	No	Yes	No	Yes	Yes
Female	53	Junior high school and below	No	No	No	No	No	0	20.8	108	5.91	4	236	4.02	141	2.21	45	237.5	37.5	69	33	29	Yes	Yes	No	No	No
Male	56	High school and technical secondary school	No	No	No	No	No	0	27.6	134	6.47	4.58	117	3.61	144	2.33	86	426.8	40.8	66	45	41	Yes	No	Yes	No	Yes
Female	59	Junior high school and below	No	No	No	No	No	0	21.7	124	7.4	4.11	172	3.32	141	2.25	69	454.8	35.8	63	55	36	No	Yes	Yes	Yes	No
Male	71	Junior high school and below	Yes	Yes	No	No	No	1	24	127	6.45	4.3	144	4.6	141	2.36	139	483.5	42.1	63	42	36	No	Yes	Yes	No	Yes
Female	58	Junior high school and below	No	No	No	No	No	0	24.4	126	7.69	4.1	292	3.41	134	2.33	67	375	41	65	61	45	No	No	No	No	No
Male	71	Junior high school and below	No	No	No	No	No	1	23.5	137	5.89	4.96	264	4	142	2.27	48	275.3	38	64	43	41	No	Yes	Yes	Yes	No
Male	60	Junior high school and below	No	Yes	No	No	No	0	27	145	7.62	4.95	153	4.71	140	2.31	90	383.2	39.7	62	58	37	No	Yes	No	Yes	Yes
Female	32	Junior high school and below	No	No	No	No	No	0	20.4	126	5.98	4.21	170	3.68	139	2.2	49	323.2	39.7	63	28	32	No	No	Yes	No	Yes
Male	54	Junior high school and below	No	Yes	No	No	No	0	18.9	127	8.28	4.36	183	3.88	139	2.2	66	222.9	39.2	70	38	32	Yes	Yes	Yes	No	Yes
Male	43	Junior high school and below	No	No	No	No	No	0	23.8	170	8.53	2.8	176	3.85	139	2.41	69	379.2	40.9	63	40	34	No	No	No	No	Yes
Male	55	Junior high school and below	No	Yes	No	No	No	0	28.1	144	10.01	4.93	223	3.81	142	2.15	90	241.2	36	70	46	65	No	Yes	Yes	Yes	No
Male	52	Junior high school and below	No	Yes	No	No	No	0	21.22	143	3.99	4.7	135	4.03	140	2.26	61	289	40.1	63	50	43	No	No	No	Yes	Yes
Female	56	Junior high school and below	No	No	No	No	Yes	2	26.7	107	3.06	3.2	125	3.59	142	2.16	71	275.8	34.3	70	35	26	No	Yes	Yes	No	Yes
Female	48	Junior high school and below	No	Yes	No	No	No	0	23.7	139	4.22	5.06	168	3.4	137	2.27	54	389.4	38.9	71	51	27	No	No	No	No	No
Female	48	Junior high school and below	No	No	No	No	No	0	21.5	128	5.79	4.22	184	3.69	140	2.26	81	326	42	62	47	28	No	No	No	No	No
Male	55	Junior high school and below	No	Yes	No	No	No	0	20.45	147	6.92	4.74	187	3.55	140	2.22	77	266.3	38.6	70	43	30	No	No	No	Yes	Yes
Male	69	Junior high school and below	No	No	No	No	No	0	25.6	135	4.74	4.64	171	3.73	139	2.22	59	290.4	37.7	51	37	44	No	No	Yes	Yes	Yes
Male	53	Junior high school and below	No	No	No	Yes	No	1	32.1	139	6.98	4.69	242	4.2	140	2.34	85	334.7	42.1	59	60	38	No	No	Yes	No	No
Female	70	Junior high school and below	No	Yes	No	No	No	1	27.9	137	6.16	4.59	286	3.86	142	2.26	64	478.2	37.1	54	77	40	Yes	Yes	Yes	No	Yes
Female	59	High school and technical secondary school	Yes	No	No	No	No	0	25.9	105	4.75	3.31	201	4.09	141	2.14	53	240.5	35.9	62	35	39	No	No	Yes	No	No
Female	41	Junior high school and below	No	No	No	No	No	0	22.3	142	3.84	4.16	90	4.11	140	2.08	43	183.3	43.9	74	73	36	No	Yes	No	Yes	No
Female	66	High school and technical secondary school	Yes	No	No	No	No	0	21.3	133	11.07	4.35	196	3.99	142	2.37	77	360	41.3	65	43	28	Yes	No	No	No	Yes
Male	47	College or above	No	Yes	No	Yes	No	0	24.9	98	9.24	5.3	162	3.91	141	2.24	77	552.7	41.9	65	28	41	No	No	No	No	No
Male	54	Junior high school and below	No	No	No	No	No	0	24.3	162	7.65	4.99	205	3.94	138	2.37	69	400.9	41.9	71	48	29	Yes	Yes	Yes	No	Yes
Male	56	Junior high school and below	No	No	No	No	No	0	25.4	150	5.69	4.84	241	4.7	141	2.48	79	387.4	45.1	48	51	40	No	Yes	No	No	No
Female	53	Junior high school and below	No	Yes	No	No	No	1	21.77	114	4.3	4.42	268	4.17	140	2.32	67	407.4	38.5	69	51	30	No	No	Yes	Yes	Yes
Male	54	Junior high school and below	No	No	No	No	No	0	24	129	4.94	4.23	138	3.76	138	2.24	66	516.9	40.3	62	51	38	No	No	No	Yes	No
Male	51	Junior high school and below	No	No	No	No	No	0	23.5	140	7.22	4.71	181	4.64	139	2.32	92	355	43.1	72	40	30	No	Yes	Yes	No	Yes
Male	21	Junior high school and below	No	No	No	No	No	0	21.7	132	6.71	4.63	210	3.64	141	2.23	71	434.3	42.7	43	44	45	No	No	Yes	Yes	No
Female	69	Junior high school and below	No	No	No	No	No	0	23.8	157	4.79	2.5	190	4.09	138	2.39	89	487.2	42.1	64	71	34	Yes	Yes	No	No	Yes
Male	51	Junior high school and below	No	Yes	No	No	No	0	30.7	168	10.09	5.97	213	4.15	139	2.33	96	557.3	40.3	58	71	40	No	Yes	Yes	No	No
Female	75	Junior high school and below	No	Yes	No	No	Yes	1	28.4	103	2.47	6.41	123	3.26	146	2.13	84	418.2	36.7	61	51	38	No	No	No	Yes	No
Male	49	Junior high school and below	No	Yes	No	No	No	0	23	153	6.92	2.45	125	4.09	142	2.07	64	210.9	33.9	61	56	29	No	No	Yes	Yes	Yes
Male	73	Junior high school and below	No	Yes	No	No	No	1	23.4	123	4.88	3.83	117	3.81	144	2.16	91	362.2	37.5	72	52	33	No	No	No	No	No
Male	73	Junior high school and below	Yes	No	No	No	Yes	3	39.2	123	4.33	3.98	309	4.38	143	2.26	78	329.4	36.8	60	44	44	No	Yes	Yes	No	No
Male	68	Junior high school and below	No	Yes	No	Yes	Yes	1	23.4	124	5.36	3.79	140	3.46	143	2.21	143	597.6	40.7	67	46	39	No	No	No	Yes	No
Male	79	Junior high school and below	No	Yes	No	No	Yes	2	21.7	126	8.52	3.8	118	3.89	142	2.48	81	516.3	35.9	58	39	49	Yes	No	No	No	Yes
Male	55	Junior high school and below	No	Yes	No	No	No	0	26.7	138	4.58	4.84	103	3.58	140	2.19	71	569.4	39.8	34	53	58	No	Yes	Yes	No	Yes
Male	68	Junior high school and below	No	No	Yes	No	No	2	38.5	151	4.25	4.69	342	3.69	141	2.29	64	300.8	39.4	70	46	37	Yes	Yes	Yes	No	No
Male	61	Junior high school and below	Yes	No	No	No	No	0	28.6	139	7.07	4.29	215	3.33	139	2.34	82	380.2	41.6	45	43	63	No	No	Yes	Yes	No
Female	65	Junior high school and below	Yes	Yes	No	No	No	0	26.2	139	5.65	4.68	219	3.52	141	2.36	49	225.3	38.3	38	34	56	No	Yes	Yes	No	Yes
Male	58	Junior high school and below	No	Yes	No	No	Yes	2	27.3	135	6.1	4.29	159	4.31	137	2.29	72	178.8	40	73	65	31	No	No	Yes	Yes	Yes
Male	59	Junior high school and below	No	No	No	No	No	2	39.6	140	4.59	4.83	354	4.42	138	2.45	63	392.9	38.6	40	36	52	No	Yes	No	No	No
Male	46	High school and technical secondary school	No	Yes	No	No	No	1	22.8	77	5.41	2.69	150	4.1	146	1.95	547	299.6	26.2	61	48	41	No	Yes	No	No	Yes
Male	58	Junior high school and below	No	No	No	No	No	0	22	113	3.69	4.1	188	3.83	139	2.14	54	328.9	39.5	64	41	37	No	No	Yes	No	No
Female	58	Junior high school and below	No	No	No	No	No	0	23	123	5.65	4.1	180	3.97	140	2.46	48	255.6	42.6	63	45	35	No	No	No	No	No
Male	69	High school and technical secondary school	Yes	Yes	No	No	No	0	19.64	122	7.22	4.5	198	3.89	143	2.18	69	434.4	36.6	71	44	34	No	No	Yes	Yes	Yes
Female	56	Junior high school and below	Yes	No	No	No	No	0	27.9	141	6.8	4.79	133	3.9	144	2.25	59	372	44.1	38	55	34	Yes	No	Yes	No	No
Female	51	Junior high school and below	No	No	No	No	No	0	30.2	143	9.29	4.82	216	3.67	137	2.23	36	329.6	42.6	72	38	23	No	No	No	No	No
Male	57	Junior high school and below	No	No	No	No	No	0	25.6	128	4.37	5.34	191	3.9	141	2.23	76	347	40.8	72	41	38	No	No	No	No	No
Male	50	Junior high school and below	No	Yes	No	No	No	0	24.3	143	7.03	4.76	179	3.65	142	2.11	127	709.2	33.1	68	39	39	Yes	No	Yes	Yes	Yes
Female	56	High school and technical secondary school	Yes	No	No	No	Yes	2	24.1	126	6.71	4.26	175	4.13	140	2.28	69	384.4	40.2	67	72	30	No	No	No	No	Yes
Female	61	Junior high school and below	No	Yes	No	No	Yes	4	19.9	111	4.89	5.41	220	4.03	142	2.18	52	247.1	36.9	75	36	28	No	No	Yes	Yes	No
Female	69	Junior high school and below	No	Yes	No	No	Yes	2	24.1	124	5.07	4.23	45	4.12	135	2.6	79	225	27	53	46	40	Yes	No	No	No	Yes
Male	64	Junior high school and below	No	No	No	No	No	0	23.2	122	7.13	4.37	310	3.94	142	2.15	67	417.3	34	66	65	40	No	Yes	No	Yes	No
Male	50	Junior high school and below	No	Yes	No	No	No	2	20	98	8.59	3.5	208	3.76	135	2.2	113	466	35.6	72	50	37	No	No	No	No	Yes
Male	34	High school and technical secondary school	No	No	No	No	No	0	26.4	131	8.12	4.91	228	3.93	141	2.27	68	406.6	40.5	73	39	31	Yes	Yes	Yes	No	Yes
Male	40	Junior high school and below	No	No	No	No	No	0	24.7	135	4.6	4.35	124	4.33	141	2.15	79	498.2	32.6	55	60	53	Yes	No	No	No	No
Male	45	Junior high school and below	No	Yes	No	No	No	0	24.5	141	4.35	4.46	131	3.83	142	2.04	93	491.6	35.1	44	52	58	No	No	Yes	No	Yes
Male	49	Junior high school and below	No	No	No	No	No	0	26.4	150	7.39	5.16	296	3.56	143	2.29	80	373.7	46.1	65	44	35	No	Yes	Yes	No	No
Male	55	Junior high school and below	No	No	No	No	No	0	28	158	5.86	5.25	166	4.31	142	2.34	87	437.9	41.9	60	44	46	No	No	Yes	No	No
Male	50	Junior high school and below	No	No	No	No	No	0	26	150	5.69	4.99	171	4.58	139	2.21	82	313.1	40.8	58	52	48	No	Yes	No	No	Yes
Male	75	Junior high school and below	No	Yes	No	No	No	2	26	136	4.75	4.52	183	3.95	141	2.12	87	264	33	48	53	57	No	Yes	No	No	Yes
Female	59	Junior high school and below	No	No	No	No	No	2	20.2	143	3.72	4.41	131	4.09	142	2.21	60	361.3	36.6	56	61	41	No	No	No	Yes	No
Female	55	Junior high school and below	No	No	No	Yes	No	1	22	136	5.51	4.29	104	4.29	141	2.39	57	299.5	44.4	58	42	26	Yes	No	Yes	Yes	Yes
Female	69	Junior high school and below	No	Yes	No	Yes	Yes	3	25.6	122	6.32	4.33	198	4.2	140	2.29	65	243	40.3	57	42	33	No	Yes	Yes	Yes	No
Male	59	High school and technical secondary school	No	No	No	No	No	0	26.9	129	4.67	4.19	113	4.4	144	2.09	98	464.5	34.3	45	54	46	No	No	Yes	Yes	Yes
Female	67	High school and technical secondary school	No	Yes	No	No	No	0	18.34	124	3.42	4.05	90	3.72	141	2.3	74	612.2	38.2	63	54	32	No	No	Yes	No	Yes
Female	59	Junior high school and below	No	No	No	No	No	0	24.8	90	6.09	2.74	69	4.1	144	2.19	85	313.8	40	72	50	26	No	No	No	Yes	Yes
Male	56	Junior high school and below	No	No	No	No	No	0	25.2	129	3.18	4.08	96	4.02	140	2.13	56	318.4	34.8	68	56	37	Yes	Yes	Yes	Yes	Yes
Male	50	Junior high school and below	No	No	No	No	No	0	26.5	159	4.9	5.31	213	4.24	140	2.31	69	332.4	40.9	61	52	42	No	No	No	Yes	No
Male	39	Junior high school and below	No	No	No	No	No	2	23.1	78	14.6	2.72	443	4.39	132.15	1.82	91.6	495.1	27.2	53	49	46	Yes	No	No	Yes	No
Female	57	Junior high school and below	No	No	No	No	No	0	20.2	118	5.72	3.86	229	3.74	140	2.3	49	252.8	41.8	58	51	37	No	No	No	No	No
Male	57	Junior high school and below	No	Yes	No	No	No	0	26.8	136	8.62	4.21	225	3.44	140	2.17	67	331.2	39.9	68	58	36	No	No	No	No	No
Male	58	Junior high school and below	No	No	Yes	No	Yes	0	22	145	6.39	4.69	208	3.72	141	2.23	63	428.7	37.4	61	57	44	No	Yes	Yes	Yes	No
Female	72	Junior high school and below	No	Yes	No	No	No	1	33.3	125	4.18	4.26	118	3.62	142	2.4	72	433.3	35.7	40	50	54	No	No	Yes	No	No
Female	60	Junior high school and below	No	No	No	No	No	0	22.55	103	5.95	3.23	256	4.04	142	2.2	46	137	36	59	31	36	No	Yes	Yes	No	Yes
Female	74	Junior high school and below	No	No	Yes	No	No	1	20.16	124	6.97	4.16	269	4.65	138	2.32	56	376.4	38.2	54	47	32	No	No	No	No	Yes
Male	71	Junior high school and below	No	Yes	No	Yes	Yes	4	27.1	150	5.98	4.73	185	3.9	140	2.31	69	462.7	38	63	42	38	No	No	No	No	No
Male	77	Junior high school and below	No	Yes	No	No	Yes	3	26	130	4.67	4.27	90	3.7	141	1.98	70	298.5	34.3	68	35	36	No	No	Yes	Yes	Yes
Female	61	Junior high school and below	No	Yes	No	No	No	0	19.8	141	7.45	4.61	140	3.96	142	2.4	46	314.2	42.8	64	43	36	No	Yes	Yes	No	Yes
Female	55	Junior high school and below	No	Yes	No	Yes	No	1	27.3	134	4.4	4.18	123	3.37	143	2.08	71	407.4	37.3	59	59	38	Yes	No	No	Yes	No
Female	42	Junior high school and below	No	No	No	No	Yes	2	23.4	136	7.63	4.51	228	3.92	140	2.16	54	190	42.6	64	52	35	No	Yes	Yes	No	No
Female	44	Junior high school and below	No	No	No	No	No	3	36.6	105	8.51	3.84	393	4.31	140	2.09	40	185.5	45.7	67	35	31	No	No	Yes	No	No
Male	73	Junior high school and below	No	Yes	No	No	No	1	20.2	126	6.47	4.06	112	4.02	143	2.32	91	444.6	33.3	59	51	39	No	No	Yes	No	Yes
Female	57	Junior high school and below	No	No	No	No	No	0	19.9	134	4.53	4.6	233	3.9	141	2.23	51	293	37.4	56	52	36	Yes	No	No	Yes	Yes
Female	59	Junior high school and below	No	No	No	Yes	Yes	3	27.5	118	5.07	4.21	181	4.31	144	2.26	70	245	42.8	57	43	34	No	Yes	No	No	Yes
Female	55	Junior high school and below	No	No	No	No	No	0	21.8	130	5.51	4.12	120	4.12	142	2.3	53	198	42.7	63	59	36	Yes	Yes	No	Yes	No
Male	55	Junior high school and below	No	No	No	No	Yes	0	26.4	160	5.8	2.67	211	3.71	142	2.26	72	326.5	41.8	58	50	31	No	No	Yes	No	Yes
Female	51	Junior high school and below	No	No	No	No	Yes	0	24.7	151	6.22	4.81	252	4.24	140	2.58	49	345.2	26.5	71	31	20	Yes	Yes	No	No	Yes
Male	68	High school and technical secondary school	Yes	No	No	No	No	0	39.5	159	9.23	5.03	199	3.93	139	2.29	68	271.3	41.6	65	61	39	No	No	Yes	No	No
Female	68	Junior high school and below	Yes	Yes	No	No	Yes	2	21.74	110	4.85	5.03	227	4.09	141	2.24	78	320.3	39.3	63	51	60	No	Yes	Yes	Yes	Yes
Male	57	Junior high school and below	No	Yes	No	No	No	0	24.2	148	7.52	4.4	185	3.5	141	2.14	91	327.7	34.4	64	44	39	No	No	Yes	No	Yes
Male	68	Junior high school and below	No	No	No	No	No	0	19.6	134	4.85	4.32	137	3.79	142	2.27	63	326.1	39	46	53	66	No	Yes	No	Yes	Yes
Female	57	Junior high school and below	No	No	No	No	No	0	24	115	4.3	3.73	233	3.48	141	2.17	65	334.2	37.7	71	52	30	No	No	Yes	No	No
Male	25	College or above	No	No	No	No	No	0	21.4	126	11.36	4.29	324	3.93	139	2.41	97	497	43.5	65	47	37	No	No	No	Yes	No
Female	54	Junior high school and below	No	No	No	No	No	0	20.8	130	6.28	4.43	212	3.69	141	2.34	51	309.7	44.9	74	39	21	No	Yes	No	No	No
Female	66	Junior high school and below	No	No	No	No	No	0	21	121	3.7	3.78	147	3.61	140	2.29	57	257	41.7	59	54	36	No	No	Yes	No	No
Male	58	Junior high school and below	No	No	No	No	No	0	22.1	157	4.38	4.81	126	3.84	140	2.28	79	503.8	43.7	46	53	34	No	No	Yes	No	Yes
Female	57	Junior high school and below	No	No	No	No	No	0	20.8	92	9.12	6.04	146	3.92	140	2.28	42	244.6	39.3	69	39	32	No	No	No	Yes	No
Male	58	Junior high school and below	Yes	No	No	No	No	0	29.9	135	5.39	4.37	159	4.12	139	2.3	72	578.2	41.5	55	76	49	No	Yes	Yes	No	No
Female	63	Junior high school and below	No	No	No	No	No	0	24	152	8.41	4.97	335	4.8	141	2.36	78	538.6	39.4	68	45	30	No	Yes	No	Yes	Yes
Female	73	Junior high school and below	No	No	No	No	No	1	24.1	129	7.11	4.1	182	4.76	142	2.46	84	431.7	39.2	51	75	33	Yes	Yes	Yes	Yes	Yes
Female	58	Junior high school and below	No	No	No	No	No	0	23.4	124	6.23	4.3	209	3.82	141	2.19	62	335.6	39.4	68	50	32	No	No	Yes	Yes	Yes
Male	60	Junior high school and below	Yes	Yes	No	No	No	0	22.9	179	4.46	3.23	181	4.14	142	2.34	131	620.4	40.6	46	46	46	Yes	No	No	No	Yes
Male	64	High school and technical secondary school	No	No	No	No	Yes	0	23.7	157	4.79	4.92	152	4.01	141	2.13	57	358.1	36.7	76	55	33	Yes	No	No	Yes	No
Female	53	Junior high school and below	No	Yes	No	No	No	0	21.2	124	7.26	4.51	220	3.61	143	2.15	88	377.3	36.6	74	41	30	No	No	Yes	No	No
Female	68	Junior high school and below	No	No	Yes	Yes	Yes	0	24.8	117	5.2	3.88	122	3.94	144	2.16	71	365.2	32.7	50	55	32	No	Yes	No	No	No
Male	70	College or above	Yes	Yes	No	No	No	1	24.2	146	5.69	4.25	157	4.07	143	2.28	99	342	40.3	70	34	26	No	Yes	No	Yes	Yes
Female	57	Junior high school and below	No	Yes	No	Yes	No	1	27.3	110	11.57	3.61	312	3.78	139	2.32	56	307.8	43.5	63	58	39	No	Yes	No	No	No
Male	68	Junior high school and below	No	No	No	No	No	2	20	115	4.21	3.59	119	4.71	137	2.27	114	428	37.4	57	40	51	No	No	Yes	Yes	Yes
Male	57	Junior high school and below	No	No	No	No	No	0	24.7	134	5.3	4.61	76	3.96	139	2.19	95	322	40.8	43	55	61	Yes	Yes	Yes	Yes	Yes
Female	58	Junior high school and below	No	Yes	No	No	No	0	27.9	135	7.94	4.88	171	3.96	140	2.43	54	394	41.3	63	55	41	No	Yes	Yes	Yes	Yes
Male	73	Junior high school and below	No	Yes	No	No	No	1	24.2	142	5.94	4.45	140	3.67	143	2.2	86	401.6	39.6	54	46	34	No	Yes	No	No	Yes
Male	65	Junior high school and below	No	Yes	No	No	Yes	2	26.8	136	3.91	5.03	135	3.92	144	2.27	94	325.8	38	56	66	51	No	Yes	Yes	Yes	No
Female	60	Junior high school and below	No	Yes	No	No	No	0	23	132	3.54	4.47	150	4	142	2.24	61	260.2	37.1	73	47	37	No	No	No	No	No
Male	45	College or above	No	No	No	No	No	0	23.5	120	8.82	3.62	332	4	140	2.23	80	372.4	40.1	68	68	31	No	Yes	Yes	No	No
Female	70	Junior high school and below	Yes	No	No	No	No	1	27.9	136	5.73	4.32	215	4.43	142	2.28	68	372.8	38.8	64	52	30	Yes	Yes	No	No	Yes
Male	65	Junior high school and below	No	No	No	No	No	0	19.8	136	7.07	4.65	178	3.6	141	2.13	78	305.5	38	61	34	33	No	No	Yes	Yes	Yes
Female	49	Junior high school and below	No	No	No	No	No	0	18.3	139	11.94	5.04	127	3.97	140	2.48	82	294.5	48.2	76	44	22	No	Yes	Yes	Yes	Yes
Female	67	Junior high school and below	No	No	No	No	No	0	22.2	117	6.66	3.71	221	3.86	140	2.35	57	279	41.8	70	39	30	No	Yes	No	No	No
Female	54	Junior high school and below	Yes	Yes	No	No	Yes	2	22.7	130	3.93	4.28	123	3.53	144	2.22	69	335	38.7	67	50	30	Yes	No	No	Yes	No
Male	55	Junior high school and below	No	No	No	No	No	0	20	130	4.03	3.76	121	3.8	141	2.2	83	305.8	37.2	50	63	51	No	No	No	No	No
Female	49	Junior high school and below	No	No	No	No	No	0	23.1	115	5.6	4.02	183	3.6	139	2.13	56	233.7	37.2	70	36	31	No	No	No	No	Yes
Female	57	Junior high school and below	No	Yes	No	Yes	No	1	23.6	94	3.59	3.55	154	3.98	137	1.69	707	453.6	30.8	61	40	30	Yes	No	No	Yes	Yes
Female	52	Junior high school and below	No	No	No	No	No	0	25.5	131	4.41	4.58	157	3.77	137	2.3	50	273.8	45	62	52	44	No	Yes	No	Yes	Yes
Female	48	Junior high school and below	No	No	No	No	No	0	23	160	4.96	5.05	145	4.26	138	2.43	69	454	44.7	67	36	31	Yes	Yes	No	No	Yes
Male	27	Junior high school and below	No	No	No	No	No	0	22.6	153	5.83	4.91	226	4.31	140	2.42	76	386.3	44.7	63	36	41	No	No	Yes	Yes	Yes
Female	33	Junior high school and below	No	No	No	No	Yes	2	18.9	100	5.54	6.28	193	3.76	138	2.17	79	308.2	38.1	61	42	30	No	Yes	Yes	Yes	No
Male	53	High school and technical secondary school	No	Yes	No	No	No	0	21.5	148	5.76	4.59	55	4.12	139	2.45	65	504.9	45.2	77	45	31	Yes	Yes	No	No	Yes
Male	67	Junior high school and below	No	No	No	No	No	0	29.1	124	6.99	4.34	143	4.07	141	2.21	83	429.7	41.2	79	75	36	No	No	No	No	No
Female	66	Junior high school and below	No	No	No	No	No	0	25.6	125	5.32	3.99	204	4.09	141	2.08	46	178	35.9	57	39	40	No	Yes	Yes	Yes	Yes
Female	85	Junior high school and below	No	No	No	No	No	2	20.8	117	5.36	4.03	200	3.81	140	2.36	58	399.1	41	62	52	35	Yes	No	No	No	No
Male	45	Junior high school and below	No	No	No	No	No	0	22.1	146	7.88	4.57	187	4.22	141	2.37	58	380.9	43.7	63	39	36	No	Yes	No	No	No
Male	47	Junior high school and below	No	No	No	No	No	0	27.2	109	8.35	3.86	214	3.55	142	2.08	92	545.6	34.7	74	58	35	No	No	No	No	No
Female	70	Junior high school and below	No	Yes	No	No	No	0	26	140	6.76	4.67	273	4.07	141	2.27	53	281.4	41.9	65	36	30	No	Yes	Yes	Yes	No
Female	60	Junior high school and below	No	No	No	No	No	0	22.5	151	7.55	5.06	263	4.35	139.49	2.14	74.4	394.1	39.4	49	69	36	No	No	Yes	No	No
Female	71	Junior high school and below	No	Yes	No	No	No	1	24.1	127	6.12	4.14	140	3.96	141	2.3	58	330.5	41.5	66	53	31	No	No	Yes	Yes	Yes
Male	54	Junior high school and below	No	No	No	No	No	0	22.5	149	6.04	5.01	186	4.2	142	2.24	73	324.2	40.5	46	47	59	No	No	No	Yes	No
Male	71	High school and technical secondary school	Yes	Yes	No	No	No	1	24.1	110	5.54	5.11	228	3.61	143	2.26	59	305.4	39	50	50	49	No	Yes	Yes	No	Yes
Male	67	Junior high school and below	No	No	No	No	No	1	23.6	136	3.99	4.37	169	3.39	143	2.12	65	297.3	34.9	64	64	35	No	Yes	Yes	Yes	Yes
Male	66	Junior high school and below	No	Yes	No	No	No	0	24	144	6.55	4.61	128	4.25	144	2.35	83	453.9	40	65	50	34	No	Yes	No	No	No
Female	68	Junior high school and below	No	Yes	No	No	No	0	25.7	119	4.97	3.94	197	4.14	142	2.3	51	295.7	41.3	69	55	31	No	No	Yes	No	No
Female	65	High school and technical secondary school	No	No	No	No	No	0	20.4	127	3.45	4.06	93	3.61	140	2.28	59	257.6	37.1	77	62	31	No	Yes	No	Yes	Yes
Female	57	Junior high school and below	No	Yes	No	No	No	0	26.6	126	5.22	4.5	199	4.25	142	2.37	52	304.4	44.5	65	45	37	No	Yes	No	Yes	Yes
Female	55	High school and technical secondary school	Yes	Yes	No	No	No	0	21.1	115	11.78	3.72	175	4.49	145	2.17	76	399	35.3	72	46	33	No	Yes	No	Yes	No
Female	54	Junior high school and below	No	No	No	No	No	0	25.3	123	4.68	4.01	143	4.41	141	2.34	71	352.5	43	68	52	33	Yes	Yes	Yes	No	No
Female	55	Junior high school and below	No	No	No	Yes	No	1	27.3	127	7.22	4.35	217	4.15	140	2.3	51	270	42.7	56	33	37	No	No	No	No	No
Male	62	Junior high school and below	No	No	No	No	No	0	22.9	143	4	4.62	174	3.84	140	2.24	47	299.6	37.7	66	52	39	Yes	No	No	Yes	Yes
Male	75	College or above	No	Yes	No	Yes	No	1	22.7	144	10.64	4.66	123	3.95	146	2.13	85	441.4	34.3	47	46	60	No	Yes	Yes	No	Yes
Male	49	High school and technical secondary school	No	No	No	Yes	No	4	38.5	151	7.02	4.69	143	4.14	134	2.35	72	387	45.2	37	50	53	No	Yes	Yes	Yes	No
Female	71	Junior high school and below	No	No	No	No	No	1	24	120	4.36	4.43	117	4.03	140	2.28	49	448.3	35.2	65	59	30	No	Yes	Yes	Yes	Yes
Male	31	College or above	No	Yes	No	No	No	0	34.5	163	8.8	6.27	295	3.76	142	2.12	110	749.2	27.5	40	48	41	Yes	No	No	No	Yes
Female	56	Junior high school and below	No	No	Yes	No	No	0	24.6	145	5.05	4.48	157	3.87	142	2.37	74	403.6	44	58	51	36	No	Yes	No	No	No
Male	52	Junior high school and below	No	No	No	No	No	0	26.3	151	4.35	5.12	159	4.48	139	2.26	86	381.9	39.4	59	64	50	No	No	Yes	No	No
Male	38	Junior high school and below	No	No	Yes	No	No	0	41.1	149	5.85	4.8	253	3.9	139	2.23	86	400.2	41.1	66	50	28	No	Yes	No	Yes	No
Male	68	Junior high school and below	No	Yes	No	No	No	2	39.1	133	7.71	4.41	232	3.69	143	2.25	76	276.1	37.5	43	39	62	No	No	No	No	No
Male	26	Junior high school and below	No	No	Yes	No	No	0	35.2	136	7.85	4.47	242	3.85	142	2.3	76	926.2	42.9	67	40	37	No	No	Yes	No	No
Female	58	Junior high school and below	No	Yes	No	No	Yes	1	26.4	135	4.87	4.55	135	4.27	139	2.42	81	360	37.8	65	49	32	No	Yes	Yes	Yes	Yes
Female	72	Junior high school and below	No	Yes	No	Yes	Yes	3	21	121	3.81	3.71	121	2.94	142	2.25	60	429.5	39	67	45	40	No	Yes	No	No	No
Female	69	Junior high school and below	No	Yes	Yes	No	No	0	19.7	132	6.91	4.43	294	4.11	138	2.39	80	339	38.9	82	38	20	Yes	No	Yes	Yes	Yes
Female	57	Junior high school and below	No	Yes	No	No	Yes	1	22.9	112	5.46	3.69	192	4.46	144	2.42	66	372	45.1	39	49	61	No	Yes	No	Yes	No
Female	81	Junior high school and below	No	No	Yes	No	No	1	23.8	106	4.68	3.93	222	4.33	133	2.16	80	506	29.1	51	55	40	No	Yes	No	No	Yes
Female	75	Junior high school and below	No	Yes	No	No	Yes	1	20.5	114	4.92	3.88	146	4.15	140	2.28	77	463.5	39.5	77	45	26	No	No	Yes	Yes	No
Male	67	High school and technical secondary school	No	No	No	No	No	0	22.2	149	5.59	4.97	149	4.14	140	2.4	72	278.9	41.8	75	37	28	No	Yes	Yes	No	No
Male	51	Junior high school and below	No	Yes	No	No	No	0	24.9	140	5.19	4.94	192	4.14	141	2.19	91	524	39.8	62	48	42	Yes	Yes	No	No	No
Female	73	Junior high school and below	No	No	Yes	Yes	No	2	21.6	131	2.75	4.13	75	3.41	140	2.44	66	239	45.1	63	40	30	No	No	No	No	No
Male	56	Junior high school and below	No	No	No	No	No	0	26.5	115	6.21	3.7	202	7.1	139	2.48	184	520	45.3	59	65	32	No	Yes	No	Yes	No
Male	54	Junior high school and below	No	Yes	No	No	No	0	26.1	184	7.59	5.85	256	4.41	139	2.56	77	684	45.9	68	57	36	No	Yes	Yes	Yes	Yes
Male	67	Junior high school and below	No	Yes	No	Yes	Yes	0	27.3	145	4.82	2.67	167	4.45	140	2.2	87	377.2	38.7	44	52	51	No	No	No	Yes	Yes
Female	67	Junior high school and below	No	No	Yes	Yes	No	1	24.7	112	2.42	6.47	110	3.69	140	2.26	73	330.7	38.5	47	59	37	No	No	No	No	No
Male	72	Junior high school and below	No	No	Yes	No	No	3	39.2	114	5.22	3.62	141	3.55	141	2.18	76	292	35.9	46	38	46	No	Yes	Yes	No	No
Male	54	College or above	No	Yes	No	No	No	1	24.8	93	4.34	3.29	250	5.24	140	2.06	546	396.2	35.8	73	49	35	Yes	Yes	Yes	Yes	Yes
Female	67	Junior high school and below	No	Yes	No	No	No	0	21.34	146	5.17	4.81	166	4.03	140	2.33	48	315	38.6	75	52	25	No	Yes	Yes	Yes	Yes
Male	64	Junior high school and below	No	No	Yes	No	No	0	37.7	128	3.99	4.24	187	3.78	141	2.27	69	300.3	38.4	63	48	29	No	No	No	No	No
Female	58	Junior high school and below	No	No	Yes	No	Yes	0	22	124	6.72	4.03	247	4.12	140	2.23	51	351.8	37.7	62	46	42	No	No	Yes	Yes	No
Male	56	College or above	No	No	Yes	No	No	0	25	134	4.18	4.42	130	4	141	2.05	69	370.6	38.1	72	76	33	No	No	No	No	No
Male	73	Junior high school and below	No	No	Yes	No	No	4	20.2	142	7.07	4.52	30	4.71	139	2.29	84	344	32.5	28	55	50	No	No	Yes	No	Yes
Female	76	Junior high school and below	No	Yes	No	No	Yes	1	23.6	109	4.06	3.44	270	4.19	138	2.34	70	414.7	37.3	63	38	34	No	Yes	No	Yes	Yes
Male	68	Junior high school and below	No	Yes	No	No	No	0	26.7	131	4.4	4.2	139	3.91	142	2.13	81	374.5	37.7	59	53	45	No	Yes	Yes	Yes	Yes
Female	68	Junior high school and below	No	No	Yes	No	Yes	2	24.2	121	5.55	2.5	142	4.56	144	2.23	80	330	31.4	50	53	32	Yes	No	Yes	No	Yes
Male	68	High school and technical secondary school	No	No	No	No	Yes	0	21.5	116	6.61	3.8	179	3.95	140	2.29	82	386.8	37.1	48	53	45	No	Yes	Yes	Yes	Yes
Female	57	Junior high school and below	No	No	No	No	Yes	0	23.7	132	4.94	4.64	140	3.56	142	2.24	53	249.8	42.1	70	39	29	Yes	No	No	Yes	Yes
Male	61	Junior high school and below	No	No	Yes	No	No	0	22.9	158	10.03	2.78	181	4.21	139	2.23	80	467.1	38.2	53	41	40	No	Yes	Yes	No	Yes
Male	76	Junior high school and below	No	No	Yes	Yes	No	2	21.3	93	4.44	6.21	173	3.81	142	2.47	677	285.6	39.4	54	45	65	No	No	No	No	No
Male	64	Junior high school and below	No	No	Yes	No	Yes	0	18.7	88	3.16	2.79	94	3.96	138	2.16	384	384	37.4	78	72	37	Yes	Yes	No	Yes	Yes
Male	29	College or above	No	No	No	No	No	0	39.6	119	6.16	4.25	310	3.96	141	2.19	141	62	36.8	69	40	33	No	Yes	No	No	No
Male	66	Junior high school and below	No	Yes	No	No	No	0	23.6	143	6.03	4.76	145	4.06	142	2.13	84	207.4	41.9	75	55	36	No	No	Yes	Yes	No
Male	68	High school and technical secondary school	Yes	Yes	Yes	No	No	0	23.5	136	6.62	4.43	135	3.41	139	2.27	82	670	39.3	74	70	33	No	Yes	Yes	No	Yes
Male	60	Junior high school and below	Yes	No	Yes	Yes	No	1	24.1	102	4.05	3.73	132	4.4	137	2.25	74	532.6	34.4	57	75	44	No	Yes	Yes	Yes	Yes
Male	62	Junior high school and below	No	Yes	No	No	No	0	20.6	145	6.95	4.74	176	3.86	140	2.29	72	344	41.2	71	36	30	No	No	Yes	Yes	Yes
Male	59	Junior high school and below	No	Yes	No	No	No	0	20.46	147	8.74	4.69	231	4.01	137	2.38	70	463	42.9	65	58	32	No	Yes	Yes	No	Yes
Male	51	Junior high school and below	No	No	No	No	No	0	23.4	150	6.37	4.71	192	4.39	139	2.29	72	349.2	41.3	59	66	57	No	No	No	No	No
Male	59	Junior high school and below	No	No	No	No	No	0	25.3	140	5.21	4.53	187	3.61	142	2.29	69	333.1	40.8	61	52	48	No	Yes	No	Yes	Yes
Female	68	High school and technical secondary school	No	Yes	No	No	No	0	23.8	130	3.35	3.89	124	3.86	144	2.4	69	269.9	42.5	50	38	46	Yes	Yes	Yes	No	Yes
Male	72	Junior high school and below	No	Yes	No	No	Yes	1	24.5	146	6.13	4.54	194	3.9	141	2.15	68	315.4	36.6	61	43	39	No	No	No	Yes	Yes
Male	55	Junior high school and below	No	No	No	No	No	0	23.7	149	7.04	4.62	252	4.78	140	2.5	65	351	48.6	68	39	31	Yes	No	No	No	No
Male	55	Junior high school and below	No	Yes	No	Yes	No	1	24.7	133	8.41	4.15	216	3.73	138	2.15	57	166.5	35.1	64	46	36	No	Yes	Yes	Yes	Yes
Female	63	Junior high school and below	No	Yes	No	Yes	No	0	21.4	147	4.67	4.78	287	4.9	136	2.49	76	436.3	26.7	65	43	38	No	Yes	Yes	No	Yes
Male	53	College or above	No	No	No	No	No	0	22.5	109	6.21	3.92	183	4.22	137	2.27	101	452	38.1	61	43	45	Yes	No	Yes	Yes	Yes
Female	72	High school and technical secondary school	Yes	Yes	No	No	No	1	24	134	5.56	4.78	180	3.77	141	2.33	63	175.2	43.4	74	42	28	No	Yes	Yes	Yes	Yes
Male	68	Junior high school and below	No	No	No	No	No	3	18.3	155	3.87	2.64	156	4.58	139	2.4	68	306.7	44	60	37	39	No	Yes	Yes	Yes	Yes
Male	60	Junior high school and below	No	Yes	No	No	No	1	27	121	5.35	4.15	127	4.11	143	2.29	49	337	38.7	69	58	36	No	No	Yes	Yes	Yes
Male	69	Junior high school and below	Yes	Yes	No	No	Yes	0	21.4	137	5.37	4.45	241	4.18	140	2.27	59	306	41	64	38	37	Yes	Yes	Yes	Yes	Yes
Female	50	Junior high school and below	No	Yes	No	No	No	0	26.3	127	3.81	3.93	57	5.57	137	2.42	751	331.6	30.4	50	47	46	No	Yes	No	Yes	Yes
Female	62	Junior high school and below	No	No	Yes	No	No	1	24.7	143	5.33	4.9	251	3.83	142	2.33	58	338	42.1	48	55	38	No	No	Yes	No	Yes
Male	54	Junior high school and below	No	No	No	No	No	0	25.1	146	7.46	4.8	222	4.56	146	2.15	91	326	42.4	32	39	57	No	No	Yes	Yes	No
Male	66	Junior high school and below	No	Yes	No	No	No	0	26.1	149	5.66	4.83	125	3.86	142	2.22	84	439.6	40.2	68	46	37	No	Yes	Yes	Yes	Yes
Female	72	Junior high school and below	No	Yes	No	Yes	No	2	23.5	125	5.59	4.08	133	3.87	139	2.26	61	247.6	38.5	73	53	21	No	Yes	No	Yes	Yes
Female	59	Junior high school and below	No	No	Yes	No	No	0	27.6	145	3.91	4.44	125	3.97	143	2.28	65	349.3	37.5	65	37	28	Yes	No	Yes	No	Yes
Male	73	Junior high school and below	No	Yes	No	No	Yes	1	21.5	132	3.08	4.1	128	4.05	143	2.24	75	318.3	39.6	67	37	32	No	No	No	No	No
Male	58	Junior high school and below	No	No	Yes	Yes	Yes	1	19.8	107	4.67	3.84	144	3.84	144	2.41	62	384.4	44.6	75	43	32	No	No	No	No	No
Male	61	Junior high school and below	No	No	No	No	No	0	25.4	136	4.8	4.58	159	3.62	141	2.22	80	444.9	38.9	77	85	29	No	Yes	Yes	Yes	Yes
Male	64	Junior high school and below	No	No	Yes	No	No	0	23	153	4.7	2.75	198	4.75	141	2.26	96	472.3	39.1	55	35	38	No	No	Yes	No	Yes
Male	59	Junior high school and below	No	No	No	No	No	0	23.4	123	3.84	5.11	106	3.62	143	2.31	70	413.2	39.5	65	42	43	Yes	Yes	Yes	Yes	Yes
Female	42	Junior high school and below	No	No	No	No	No	0	20.2	122	3.05	3.9	135	3.99	140	2.23	62	313.2	40.5	68	38	27	No	Yes	Yes	Yes	Yes
Male	69	Junior high school and below	No	Yes	No	No	No	2	20	123	6.15	3.54	123	3.56	138	2.29	96	654.2	41.5	77	34	27	Yes	No	No	Yes	Yes
Male	79	Junior high school and below	No	Yes	No	No	No	1	27.2	133	6.32	4.23	171	3.81	140	2.23	58	455.5	36.2	59	48	49	No	Yes	Yes	Yes	Yes
Female	64	Junior high school and below	No	No	No	No	Yes	0	24.4	97	3.19	3.34	176	4.09	141	2.29	41	248.7	38.9	62	44	40	No	Yes	Yes	No	Yes
Male	30	College or above	No	No	No	No	No	0	22.7	120	7	4.72	67	4.29	143	2.21	81	367.4	37.3	53	43	46	No	Yes	Yes	No	Yes
Female	61	Junior high school and below	No	Yes	No	No	Yes	2	26.9	132	5.92	4.73	143	3.51	143	2.45	56	363.1	43.4	74	41	30	Yes	Yes	No	Yes	Yes
Female	58	Junior high school and below	No	No	No	No	No	1	22.1	137	5.74	4.88	178	3.71	143	23.27	69	277.6	37.2	53	44	43	No	No	Yes	No	Yes
Female	43	High school and technical secondary school	No	No	No	No	No	0	26.8	136	5.2	4.44	143	3.89	141	2.26	53	181	38.8	61	45	33	No	Yes	Yes	Yes	No
Female	59	Junior high school and below	Yes	No	No	No	No	0	25.7	157	5.43	2.56	205	4.31	141	2.22	59	275	40.5	68	41	24	No	Yes	Yes	Yes	Yes
Female	71	Junior high school and below	No	No	No	No	No	2	19.9	105	4.78	3.18	130	4.12	130	2.06	55	267.4	34.6	77	62	29	Yes	No	Yes	Yes	Yes
Female	56	Junior high school and below	No	Yes	No	Yes	No	1	23.9	116	13.18	4.24	403	3.98	140	2.44	59	238.9	44.1	70	47	24	No	No	Yes	No	No
Male	75	High school and technical secondary school	Yes	No	No	No	No	1	19.7	139	5.93	4.44	170	3.96	140	2.15	94	176	42.1	65	32	34	No	Yes	Yes	No	Yes
Male	35	Junior high school and below	No	Yes	No	No	No	1	26.8	113	6.47	4.07	256	5.88	136	2.5	1212	447.3	44.4	74	54	37	No	No	No	Yes	No
Male	60	Junior high school and below	No	No	No	No	Yes	2	25.3	138	4.32	4.07	96	3.56	137	2.15	122	698.4	29.7	56	71	40	Yes	Yes	No	Yes	Yes
Female	51	Junior high school and below	No	No	No	No	Yes	0	23.5	116	5.07	3.85	252	3.76	141	2.18	52	343.3	39.8	74	48	25	No	No	Yes	Yes	Yes
Male	60	College or above	No	Yes	No	No	No	0	23.9	153	6.73	4.74	128	4.59	137	2.43	78	429.4	49	64	64	29	No	No	No	Yes	Yes
Female	70	Junior high school and below	No	No	Yes	No	No	1	22.9	134	5.28	4.66	237	3.97	142	2.24	59	257.2	42.6	55	52	50	No	Yes	Yes	Yes	Yes
